# Supplementary material for: Selenium uptake, tolerance and reduction in Flammulina velutipes supplied with selenite
Source: PubMed Central journal article supplement (PMC4986802; doi:10.7717/peerj.1993), 2016-05-11
Supplement: peerj-04-1993-s005.pdf [file peerj-04-1993-s005.pdf]

**Table S1** The 12 species of mushrooms<sup>a</sup> used in this study and their ecological habits

| No. | Species                       | Cultivar        | Ecological habit                                                                                    |
|-----|-------------------------------|-----------------|-----------------------------------------------------------------------------------------------------|
| 1   | <i>Flammulina velutipes</i>   | Chuanjin No. 11 | Grows primarily on hard woods and occasionally on conifers as a white rot fungus                    |
| 2   | <i>Wolfiporia cocos</i>       | PC1             | Grows in soil (especially sandy) as a brown rot fungus and usually a parasite of <i>Pinus</i> roots |
| 3   | <i>Pleurotus ostreatus</i>    | P1201           | White rot decomposer of hard wood                                                                   |
| 4   | <i>Pleurotus eryngii</i>      | Xingbaogu-6     | A weak parasite on the roots and stems of umbellifers                                               |
| 5   | <i>Ganoderma lingzhi</i>      | Chuanzhi No. 6  | Grows on angiosperm (living or dead) stump, trunk and root                                          |
| 6   | <i>Lentinula edodes</i>       | L1201           | Grows on trunks of the Fagaceae family as a white rot fungus                                        |
| 7   | <i>Inonotus sanghuang</i>     | SH2101          | Grows on <i>Morus</i> trunks in wild                                                                |
| 8   | <i>Oudemansiella radicata</i> | O201            | Grows on rotten wood, or in soil connected with buried wood by pseudorhiza                          |
| 9   | <i>Auricularia polytricha</i> | Chuaner No. 5   | Grows on branches and decaying trunks, stumps or logs                                               |
| 10  | <i>Hypsizygus marmoreus</i>   | Lw1201          | Grows on stems of maple, beech, especially on injured parts                                         |
| 11  | <i>Morchella importuna</i>    | M1S             | Grows in hard wood forest, saprotrophic and symbiotic                                               |
| 12  | <i>Cordyceps militaris</i>    | C1207           | A parasite of larvae or pupae of lepidopteran insects                                               |

a: All strains were provided by Soil and Fertilizer Institute, Sichuan Academy of Agricultural Sciences.
