# Supplementary material for: Selenium uptake, tolerance and reduction in Flammulina velutipes supplied with selenite
Source: PubMed Central journal article supplement (PMC4986802; doi:10.7717/peerj.1993), 2016-05-11
Supplement: peerj-04-1993-s006.pdf [file peerj-04-1993-s006.pdf]

**Table S2** Phylogenetical status of the mushrooms used in this study.

| No. | Species                                 | Family           | Order          | Class           |
|-----|-----------------------------------------|------------------|----------------|-----------------|
| 1   | <i>Flammulina velutipes</i>             | Physalacriaceae  | Agaricales     | Agaricomycetes  |
| 2   | <i>Wolfiporia cocos</i>                 | Polyporaceae     | Polyporales    | Agaricomycetes  |
| 3   | <i>Pleurotus ostreatus</i>              | Pleurotaceae     | Agaricales     | Agaricomycetes  |
| 4   | <i>Pleurotus eryngii</i>                | Pleurotaceae     | Agaricales     | Agaricomycetes  |
| 5   | <i>Ganoderma lingzhi</i>                | Ganodermataceae  | Polyporales    | Agaricomycetes  |
| 6   | <i>Lentinula edodes</i>                 | Marasmiaceae     | Agaricales     | Agaricomycetes  |
| 7   | <i>Inonotus sanghuang</i>               | Hymenochaetaceae | Hymenochales   | Agaricomycetes  |
| 8   | <i>Oudemania siellaradicata</i>         | Physalacriaceae  | Agaricales     | Agaricomycetes  |
| 9   | <i>Auricularia polytricha</i>           | Auriculariaceae  | Auriculariales | Agaricomycetes  |
| 10  | <i>Hypsizygus marmoreus</i>             | Lyophyllaceae    | Agaricales     | Agaricomycetes  |
| 11  | <i>Morchella importuna</i> <sup>a</sup> | Morchellaceae    | Pezizales      | Pezizomycetes   |
| 12  | <i>Cordyceps militaris</i> <sup>a</sup> | Cordycipitaceae  | Hypocreales    | Sordariomycetes |

a: belongs to *Ascomycota*, others belong to *Basidiomycota*.
