# Supplementary material for: Selenium uptake, tolerance and reduction in Flammulina velutipes supplied with selenite
Source: PubMed Central journal article supplement (PMC4986802; doi:10.7717/peerj.1993), 2016-05-11
Supplement: peerj-04-1993-s007.pdf [file peerj-04-1993-s007.pdf]

**Table S3** Growth rate (expressed as the slope  $k$ ) of *F. valutipes* under selenite treatments of various concentrations and their comparisons with the selenite-free treatment.

| Selenite concentration (mM) | Linear growth period (day) | $k$  | $p$ value          |
|-----------------------------|----------------------------|------|--------------------|
| 0                           | 1 - 6                      | 1.25 |                    |
| 0.001                       | 1 - 6                      | 1.23 | 0.5619             |
| 0.01                        | 1 - 6                      | 1.27 | 0.6855             |
| 0.03                        | 1 - 6                      | 1.25 | 0.8699             |
| 0.1                         | 1 - 7                      | 1.11 | <b>0.0026</b>      |
| 0.3                         | 1 - 7                      | 1.10 | <b>0.0001</b>      |
| 1                           | 1 - 4                      | 0.72 | <b>&lt; 0.0001</b> |

The mycelial growth after the initial adaption period in the solid cultivation was fitted by a linear regression, and the growth rate was expressed as the slope  $k$ .

### SAS procedure for the slope comparison

SAS procedure for  $k$  comparison between 0 and 0.001 treatment in **Table 1**

```

data comp;
input id group time diameter@@; /*time: days after inoculation; diameter: means of
colony diameter*/
cards;
1      1      1      1.025
2      1      2      2.044
3      1      3      3.311
4      1      4      4.638
5      1      5      5.908
6      1      6      7.220
7      2      1      1.045
8      2      2      1.970
9      2      3      3.235
10     2      4      4.445
11     2      5      5.839
12     2      6      7.088
;
run;
proc reg data=comp;
by group;
model diameter=time;
run;
data comp2;
set comp;

```

```
group1=.;  
if group=1 then group1=1; else group1=0;  
group1time=group1*time;  
run;  
proc reg data=comp2;  
model diameter=group1 time group1time;  
test group1time=0; /*if P value < 0.05, this the hypothesis is rejected, and the k values  
is significantly different between 0 and 1E-3, otherwise the difference is not  
significant*/  
run;
```
