# Supplementary material for: Selenium uptake, tolerance and reduction in Flammulina velutipes supplied with selenite
Source: PubMed Central journal article supplement (PMC4986802; doi:10.7717/peerj.1993), 2016-05-11
Supplement: peerj-04-1993-s008.pdf [file peerj-04-1993-s008.pdf]

**Table S4** Growth rate (expressed as the slope  $k$ ) of *F. valutipes* after exposing to selenite of 3 or 5 mM for 20, 23, 32 and 65 days and their comparisons with the selenite-free treatment.

| Days of exposure to selenite (day) | Selenite concentraion (mM) | Linear growth period (day) | $k$  | $p$ value            |
|------------------------------------|----------------------------|----------------------------|------|----------------------|
| 0                                  | 0                          | 1 - 6                      | 1.25 |                      |
| 20                                 | 3                          | 3 - 9                      | 1.21 | 0.3771               |
|                                    | 5                          | 5 - 10                     | 1.26 | 0.7772               |
| 23                                 | 3                          | 3 - 9                      | 1.20 | 0.2275               |
|                                    | 5                          | 4 - 9                      | 1.06 | 0.0078               |
| 32                                 | 3                          | 3 - 8                      | 1.21 | 0.2640               |
|                                    | 5                          | 4 - 9                      | 0.92 | 0.0002               |
| 65                                 | 3                          | 2 - 8                      | 1.14 | 0.1325               |
|                                    | 5                          |                            | 0    | <0.0001 <sup>a</sup> |

a: t-test, significance of the difference between the  $k$  of selenite-free treatment and 0 (no growth was observed for the inocula after 65 days of exposure to 5 mM selenite).
