# Supplementary material for: Selenium uptake, tolerance and reduction in Flammulina velutipes supplied with selenite
Source: PubMed Central journal article supplement (PMC4986802; doi:10.7717/peerj.1993), 2016-05-11
Supplement: peerj-04-1993-s010.pdf [file peerj-04-1993-s010.pdf]

**Table S6** Responses of the 12 species of mushrooms to 0.1 mM selenite in the solid cultivation.

| Species                       | Growth rate | Colony density | Colony height | Other morphological characters <sup>c</sup> | Pigment secretion | Comprehensive sensitivity |
|-------------------------------|-------------|----------------|---------------|---------------------------------------------|-------------------|---------------------------|
| <i>F. velutipes</i>           | -- (11.2%)  | -              | o             | o                                           | o                 | moderate                  |
| <i>W. cocos</i>               | -- (14.3%)  | --             | --            | ++                                          | ++                | high                      |
| <i>P. ostreatus</i>           | o           | o              | o             | o                                           | ++                | moderate                  |
| <i>P. eryngii</i>             | o           | o              | o             | o                                           | o                 | low                       |
| <i>G. lingzhi<sup>a</sup></i> | o           | o              | o             | o                                           | o                 | low                       |
| <i>G. lingzhi<sup>b</sup></i> | -- (22.9%)  | o              | o             | o                                           | o                 | moderate                  |
| <i>L. edodes</i>              | o           | o              | -             | o                                           | o                 | low                       |
| <i>I. sanghuang</i>           | o           | o              | o             | o                                           | ++                | moderate                  |
| <i>O. radicata</i>            | o           | o              | o             | o                                           | o                 | low                       |
| <i>A. polytricha</i>          | + (2.2%)    | o              | o             | o                                           | o                 | low                       |
| <i>H. marmoreus</i>           | + (8.2%)    | o              | o             | o                                           | o                 | low                       |
| <i>M. importuna</i>           | o           | -              | -             | ++                                          | ++                | high                      |
| <i>C. militaris</i>           | + (9.2%)    | -              | --            | o                                           | -                 | moderate                  |

a: 1-6 days of mycelial growth, b: 6-11 days of mycelial growth.

c: changes of colony morphology characters other than growth rate, colony density and height, for example, shape of colony margin, appearance of sclerotium, twists of mycelia.

o: no significant change after 0.1 mM selenite treatment compared with CK, +: slight increase, ++: obvious increase, -: slight decrease, --: obvious decrease. For growth rate, data in the parentheses are changes of *k* after 0.1 mM selenite treatment, and those less than 10% were regarded as slight changes, those more than 10% were regarded as obvious changes.

For the comprehensive sensitivity, low: no obvious change in colony characters; moderate: only one obvious change; high: two or more obvious changes.
