# Supplementary material for: Selenium uptake, tolerance and reduction in Flammulina velutipes supplied with selenite
Source: PeerJ journal article supplement (doi:10.7717/peerj.1993), 2016-05-11
Supplement: Table_S5.pdf [file Table_S5.pdf]

**Table S5** Ratios of different selenite species at different pH<sup>a</sup>.

| pH  | Ratio (%)                       |                                 |                                |
|-----|---------------------------------|---------------------------------|--------------------------------|
|     | H <sub>2</sub> SeO <sub>3</sub> | HSeO <sub>3</sub> <sup>1-</sup> | SeO <sub>3</sub> <sup>2-</sup> |
| 5.5 | 0.111                           | 92.575                          | 7.313                          |
| 6.5 | $6.545 \times 10^{-3}$          | 55.844                          | 44.156                         |
| 7.5 | $1.316 \times 10^{-4}$          | 11.227                          | 88.773                         |

a: The ratios were calculated based on the acid dissociation constants of H<sub>2</sub>SeO<sub>3</sub> ( $K_1=2.7 \times 10^{-3}$ ,  $K_2=2.5 \times 10^{-7}$ ).
